# Supplementary material for: Structural insight into toxin secretion by contact-dependent growth inhibition transporters
Source: eLife journal article supplement (doi:10.7554/elife.58100), 2020-10-22
Supplement: supp [file elife-58100-supp-v1.zip]

Archive with 18 entries (18 files):
- elife_poa_e58100_Transparent_Reporting_File.pdf
- elife_poa_e58100_Video_1.mp4
- elife_poa_e58100_Video_2.mp4
- elife_poa_e58100_Video_3.mp4
- elife_poa_e58100_Video_4.mp4
- elife_poa_e58100_Video_5.mp4
- elife_poa_e58100_Figure_1_figure_supplement_1.tif
- elife_poa_e58100_Figure_1_figure_supplement_2.tif
- elife_poa_e58100_Figure_1_figure_supplement_3.tif
- elife_poa_e58100_Figure_2_figure_supplement_1.tif
- elife_poa_e58100_Figure_3_figure_supplement_1.tif
- elife_poa_e58100_Figure_5_figure_supplement_1.tif
- elife_poa_e58100_Figure_6_figure_supplement_1.tif
- elife_poa_e58100_Figure_7_figure_supplement_1.tif
- elife_poa_e58100_Figure_7_figure_supplement_2.tif
- elife_poa_e58100_Figure_7_figure_supplement_3.tif
- elife_poa_e58100_Figure_2_source_data_1.docx
- elife_poa_e58100_Supplementary_file_1.docx
