# Supplementary material for: Structural insight into toxin secretion by contact-dependent growth inhibition transporters
Source: eLife journal article supplement (doi:10.7554/elife.58100), 2020-10-22
Supplement: supp [file elife-58100-supp-v1.zip › elife_poa_e58100_Figure_2_source_data_1.docx]

| CdiB *A.baumannii* | | | | |  | CdiB *E.coli* | | | | |
| --- | --- | --- | --- | --- | --- | --- | --- | --- | --- | --- |
| **β-Barrel** |  | **H1** |  | **loop6** | **β-Barrel** |  | **H1** |  | **loop6** |
| R356 | s | D5 |  |  | Q214 | h | R10* | h | K440 |
| Q295 | h | V6 |  |  |  |  | R10 | h | S429 |
| Q295 | h | V6 |  |  |  |  | R10 | h | G431 |
| S266 | h | S10 |  |  | Q214 | h | Q14* | h | G431 |
| N268 | h | S10 |  |  | R324 | h | Q16 |  |  |
| Y291 | h | S10 |  |  |  |  | Q17 | h | S429 |
| S312 | h | Q11 |  |  | T352 | h | Q27 |  |  |
| S270 | h | Q14 |  |  | N363 | h2 | Q27 |  |  |
| N289 | h | Q14 |  |  | S398 | h | R28 |  |  |
| N237 | h | R17 |  |  | Q400 | h | R28 |  |  |
| S270 | h | R17 |  |  |  |  |  |  |  |
| Q276 | hx2 | Q26 |  |  |  |  |  |  |  |
| R422 | sx2 | D27 |  |  |  |  |  |  |  |
