# Supplementary figures and images for: Structural insight into toxin secretion by contact-dependent growth inhibition transporters
Source: eLife journal article supplement (doi:10.7554/elife.58100), 2020-10-22

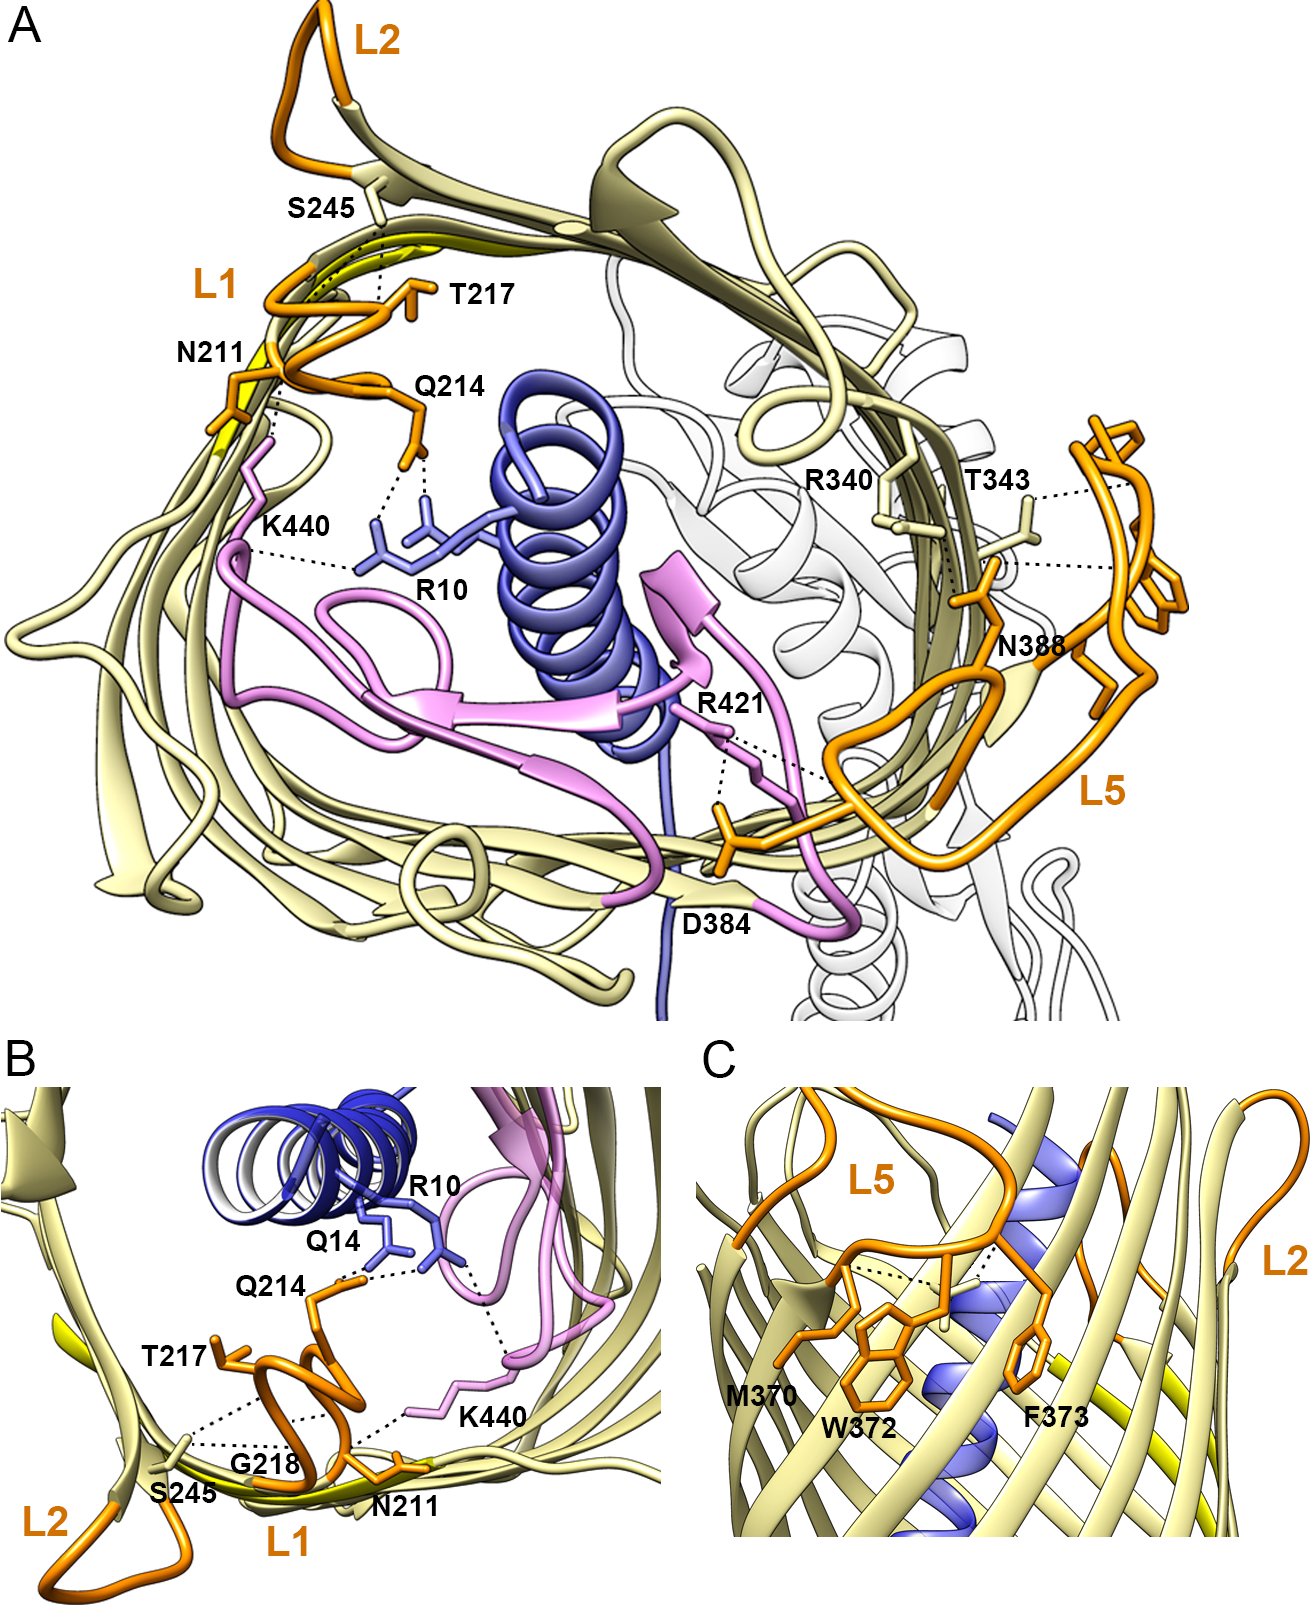

Supplement: supp [file elife-58100-supp-v1.zip › elife_poa_e58100_Figure_1_figure_supplement_1.tif]

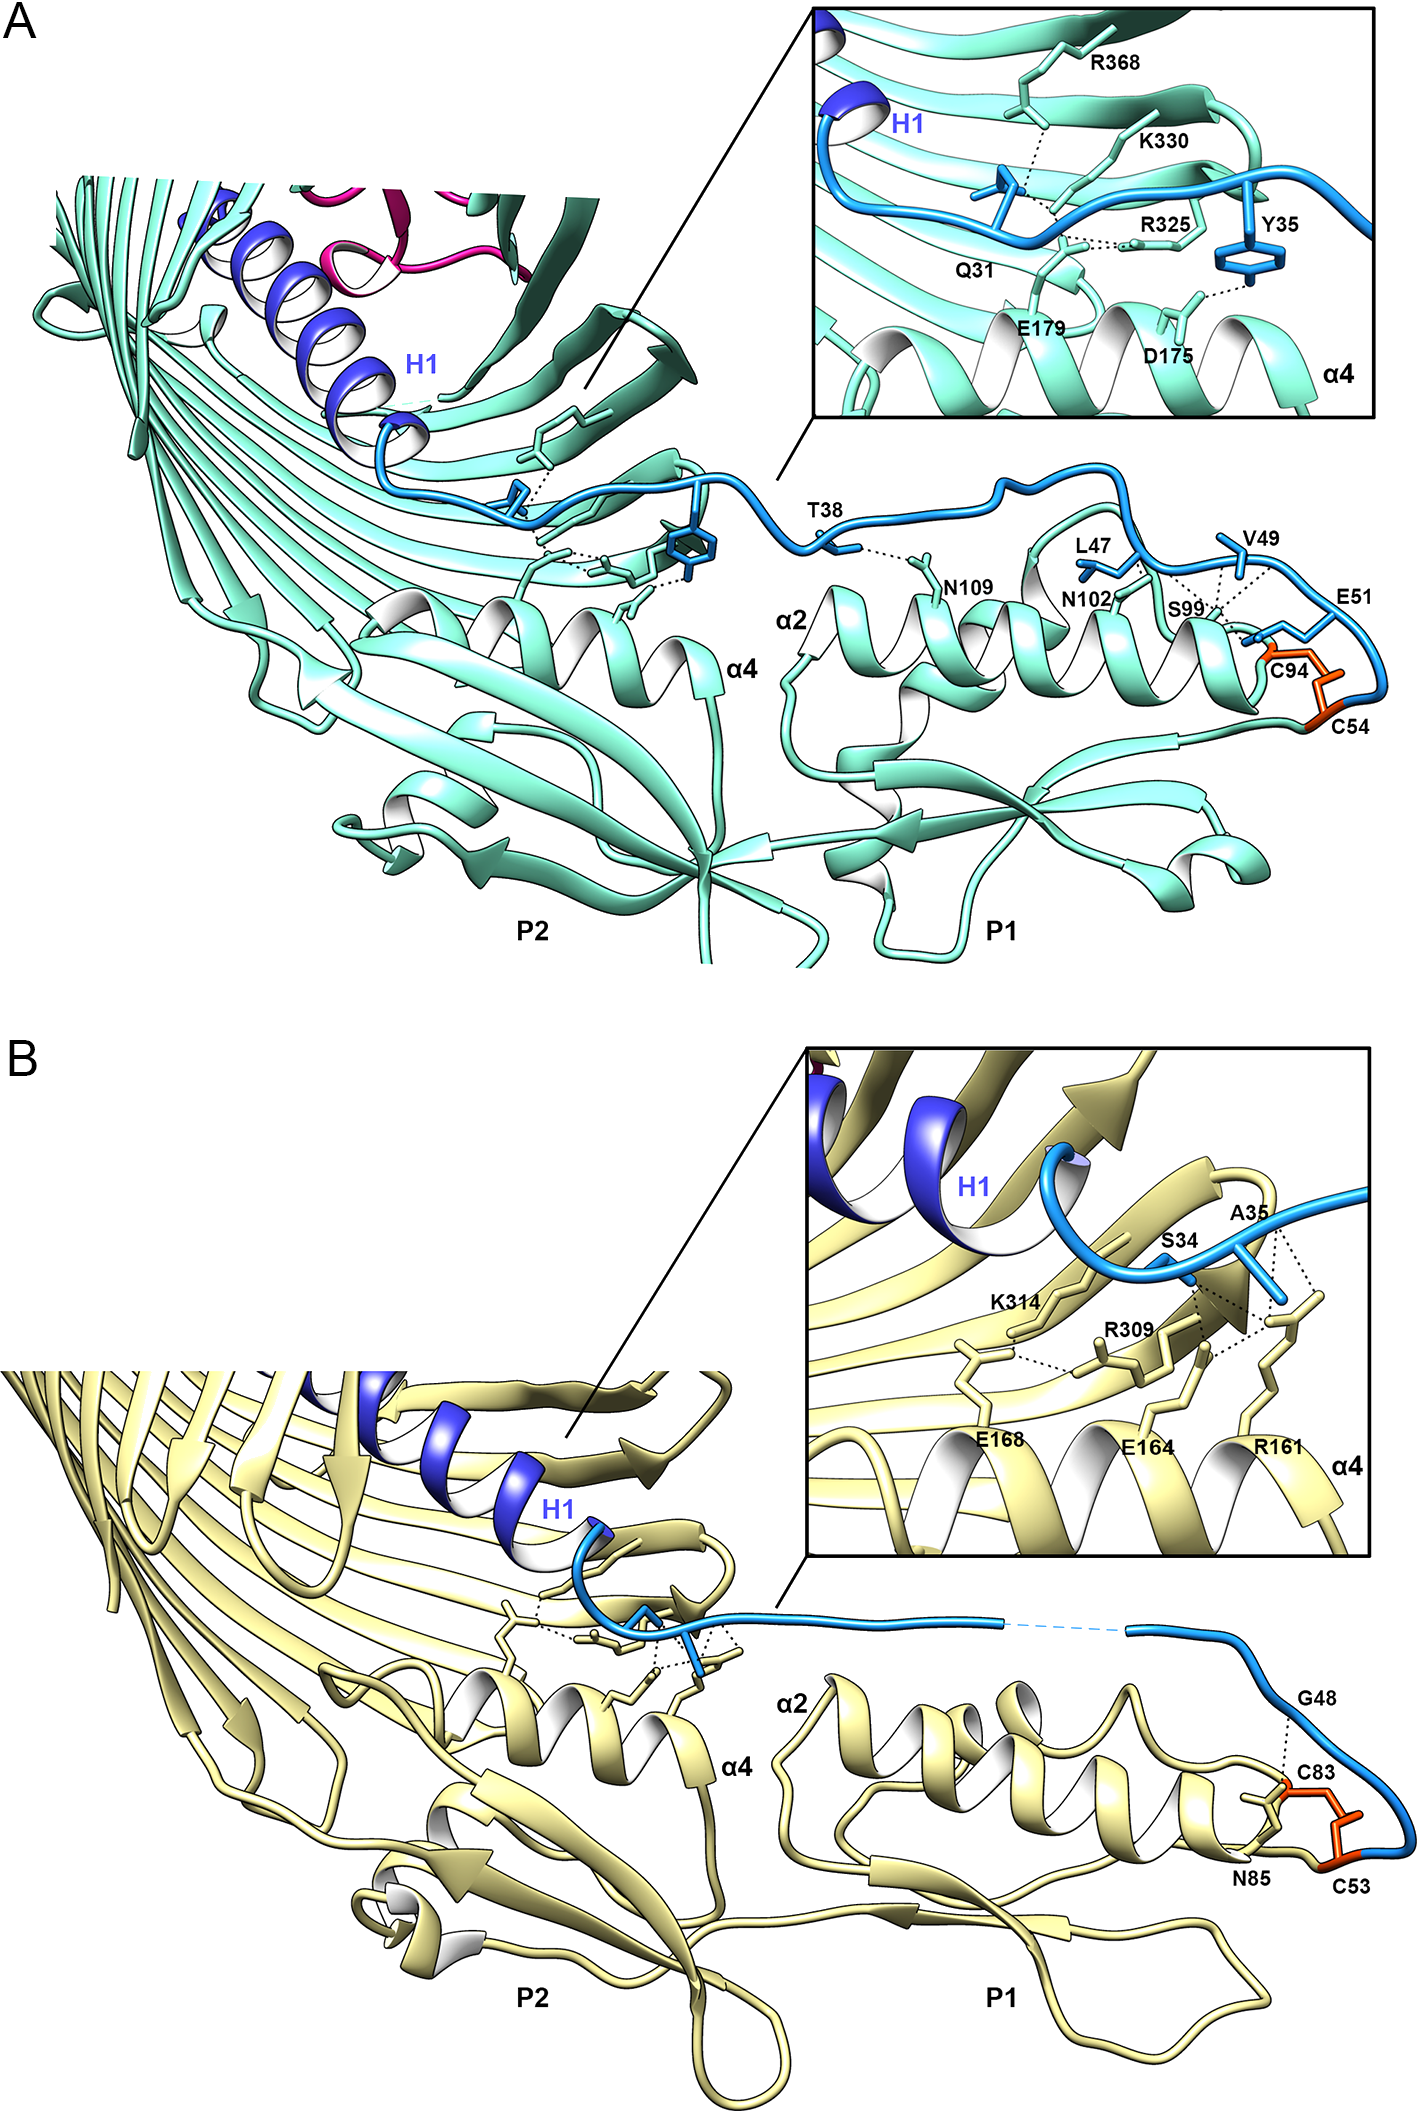

Supplement: supp [file elife-58100-supp-v1.zip › elife_poa_e58100_Figure_1_figure_supplement_2.tif]

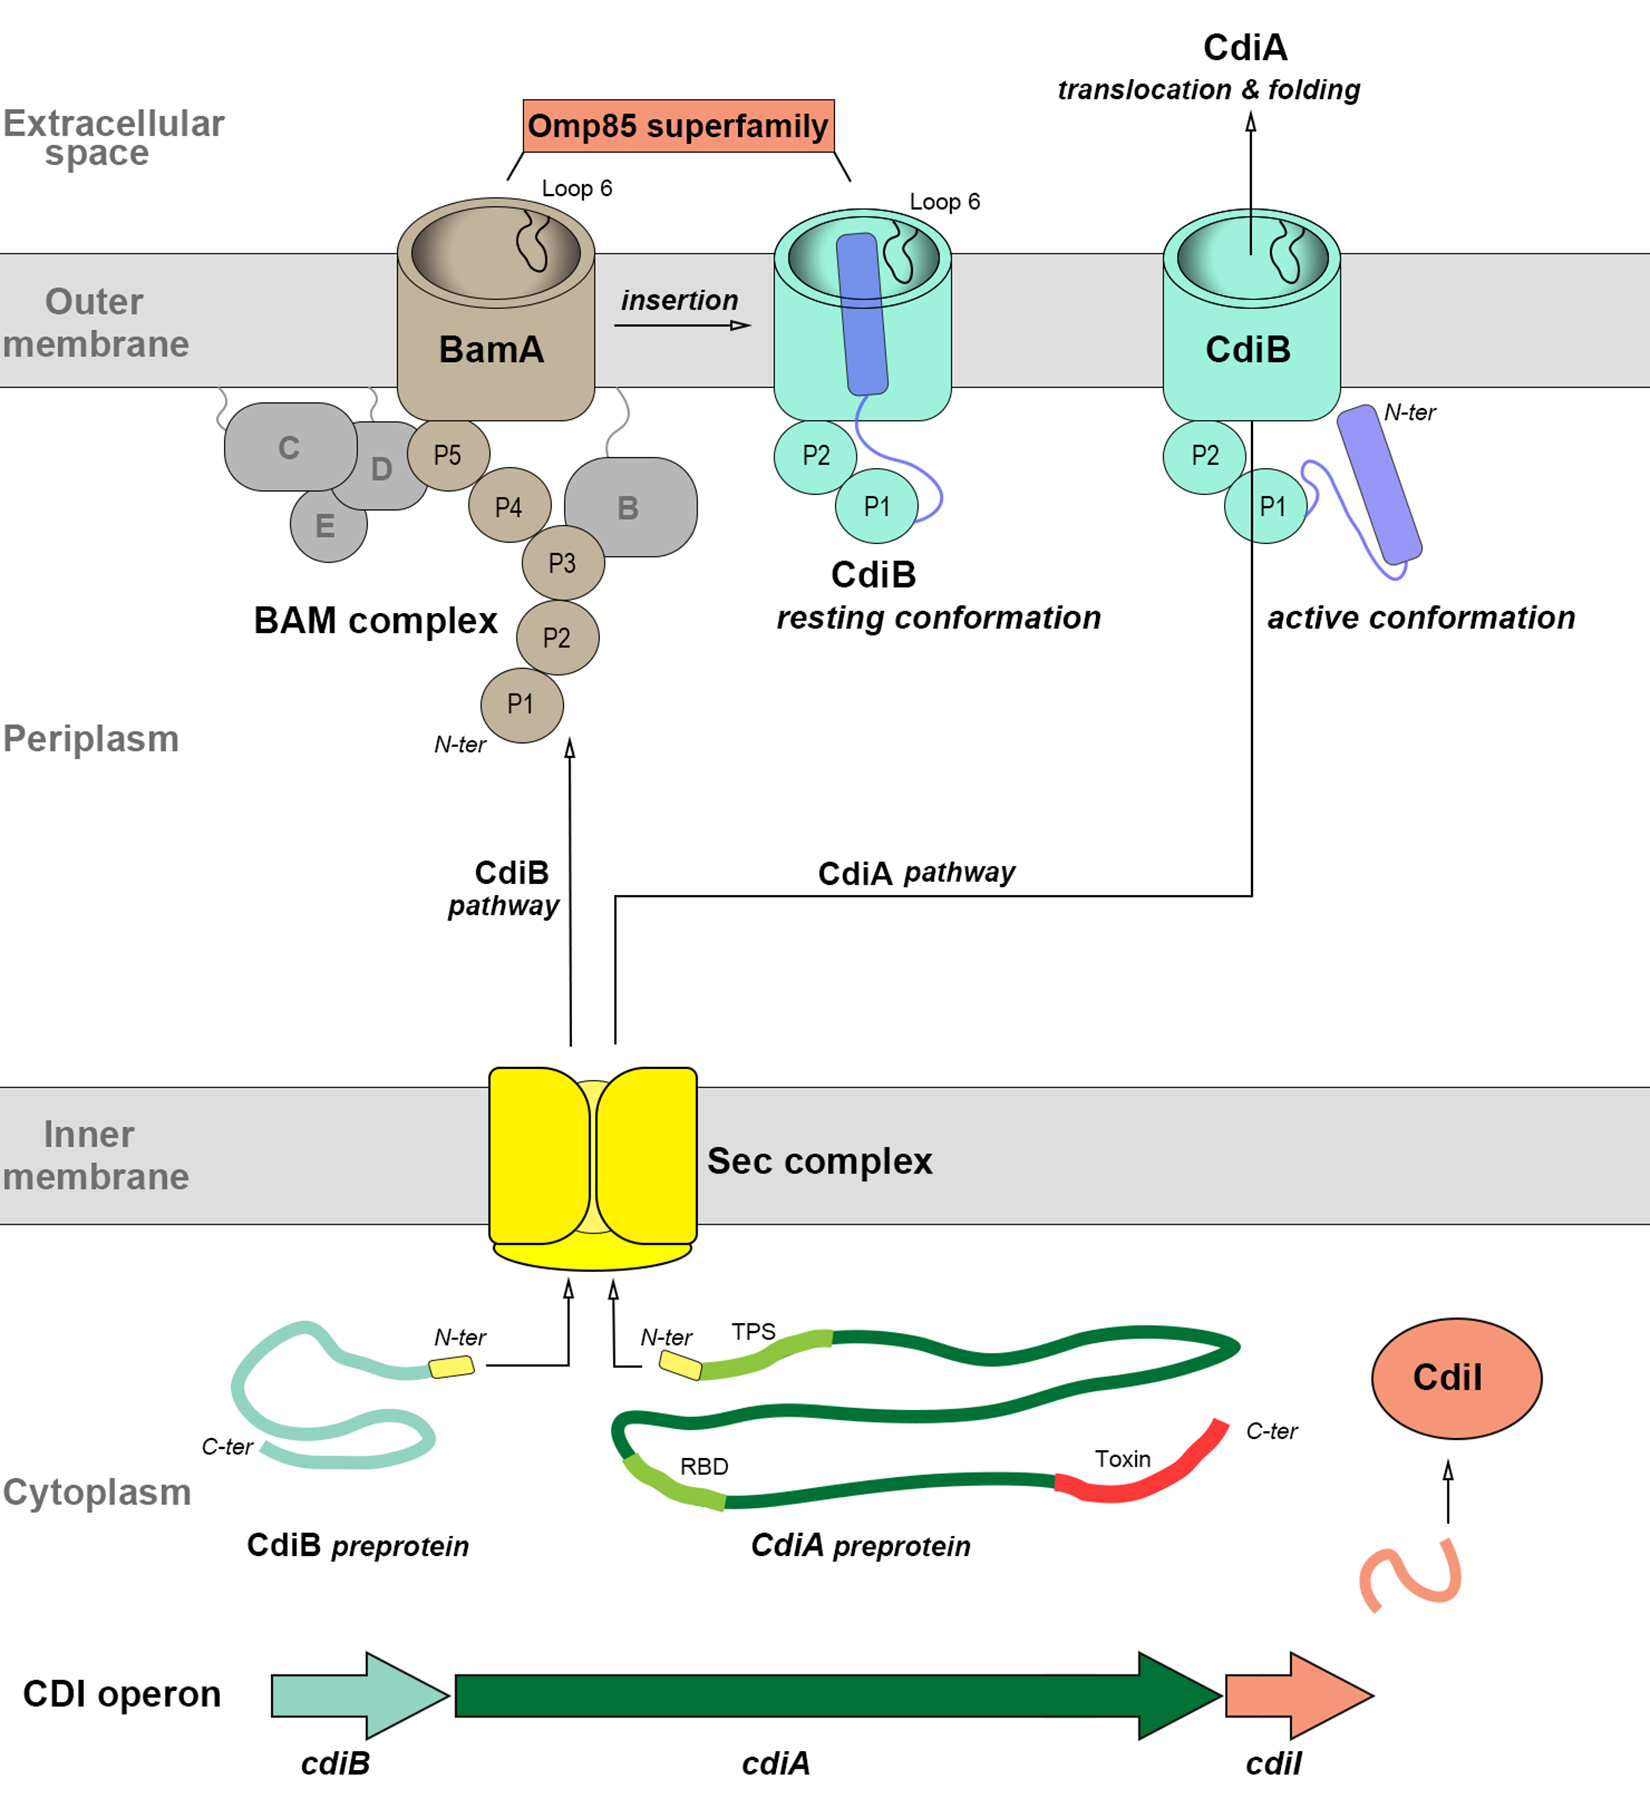

Supplement: supp [file elife-58100-supp-v1.zip › elife_poa_e58100_Figure_1_figure_supplement_3.tif]

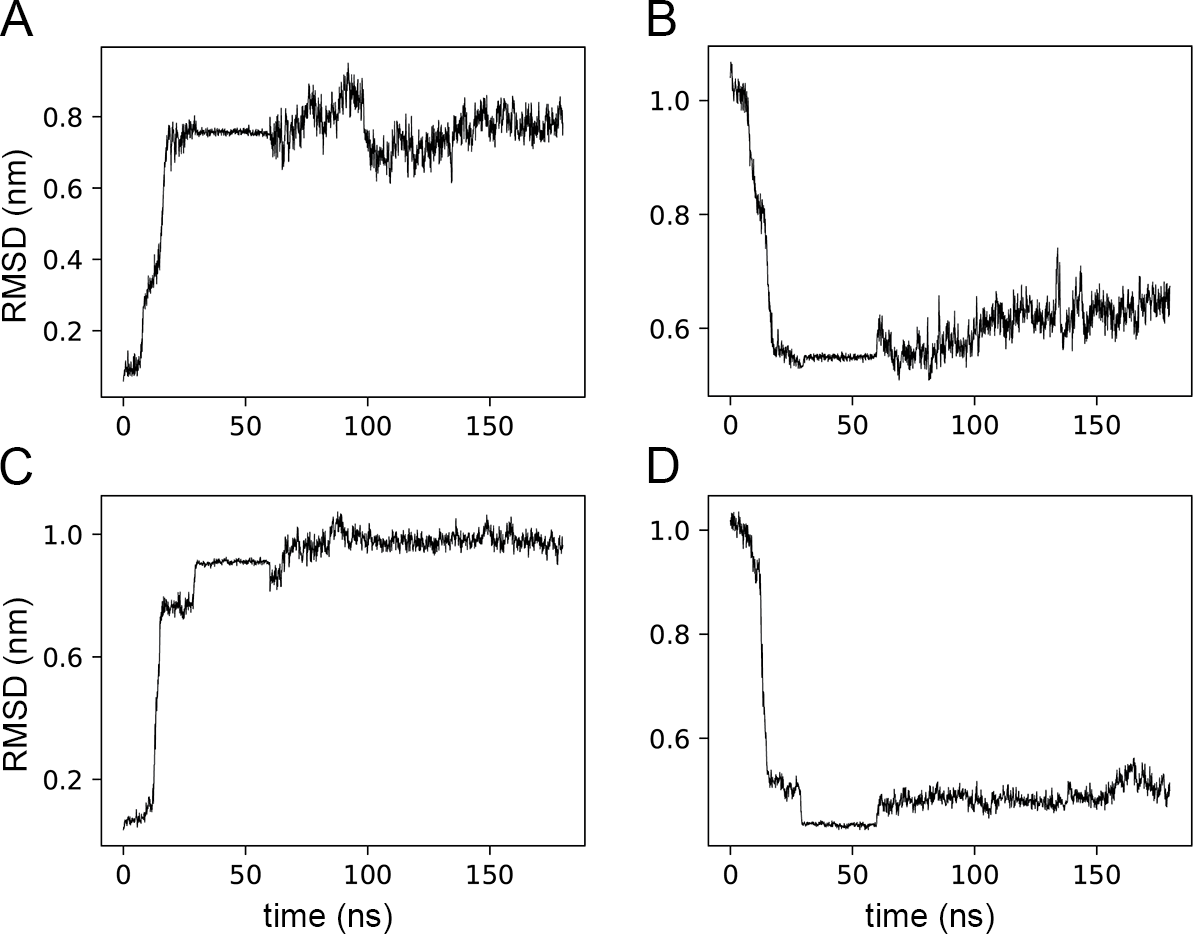

Supplement: supp [file elife-58100-supp-v1.zip › elife_poa_e58100_Figure_2_figure_supplement_1.tif]

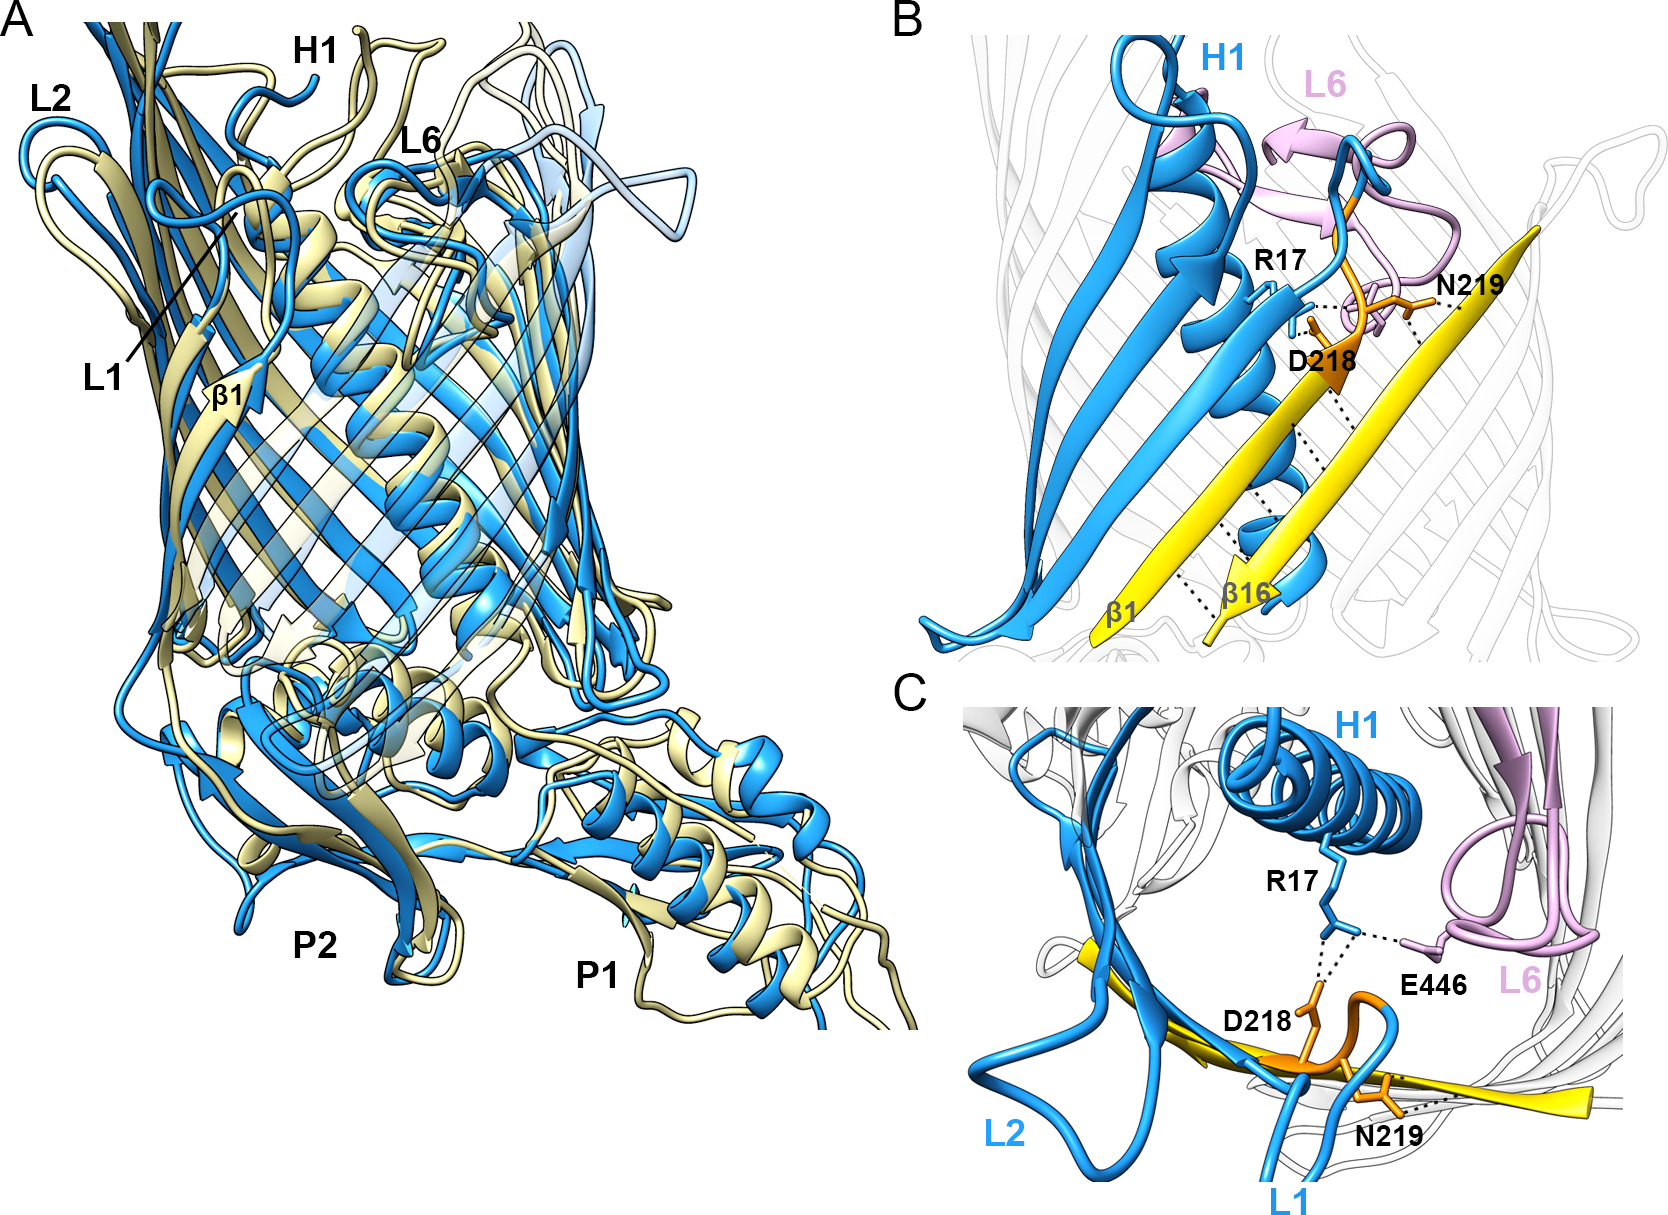

Supplement: supp [file elife-58100-supp-v1.zip › elife_poa_e58100_Figure_3_figure_supplement_1.tif]

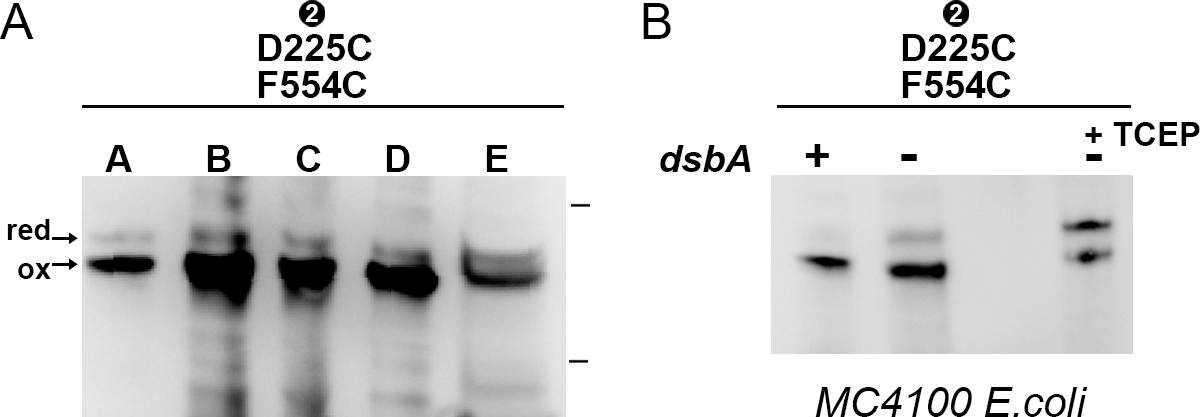

Supplement: supp [file elife-58100-supp-v1.zip › elife_poa_e58100_Figure_5_figure_supplement_1.tif]

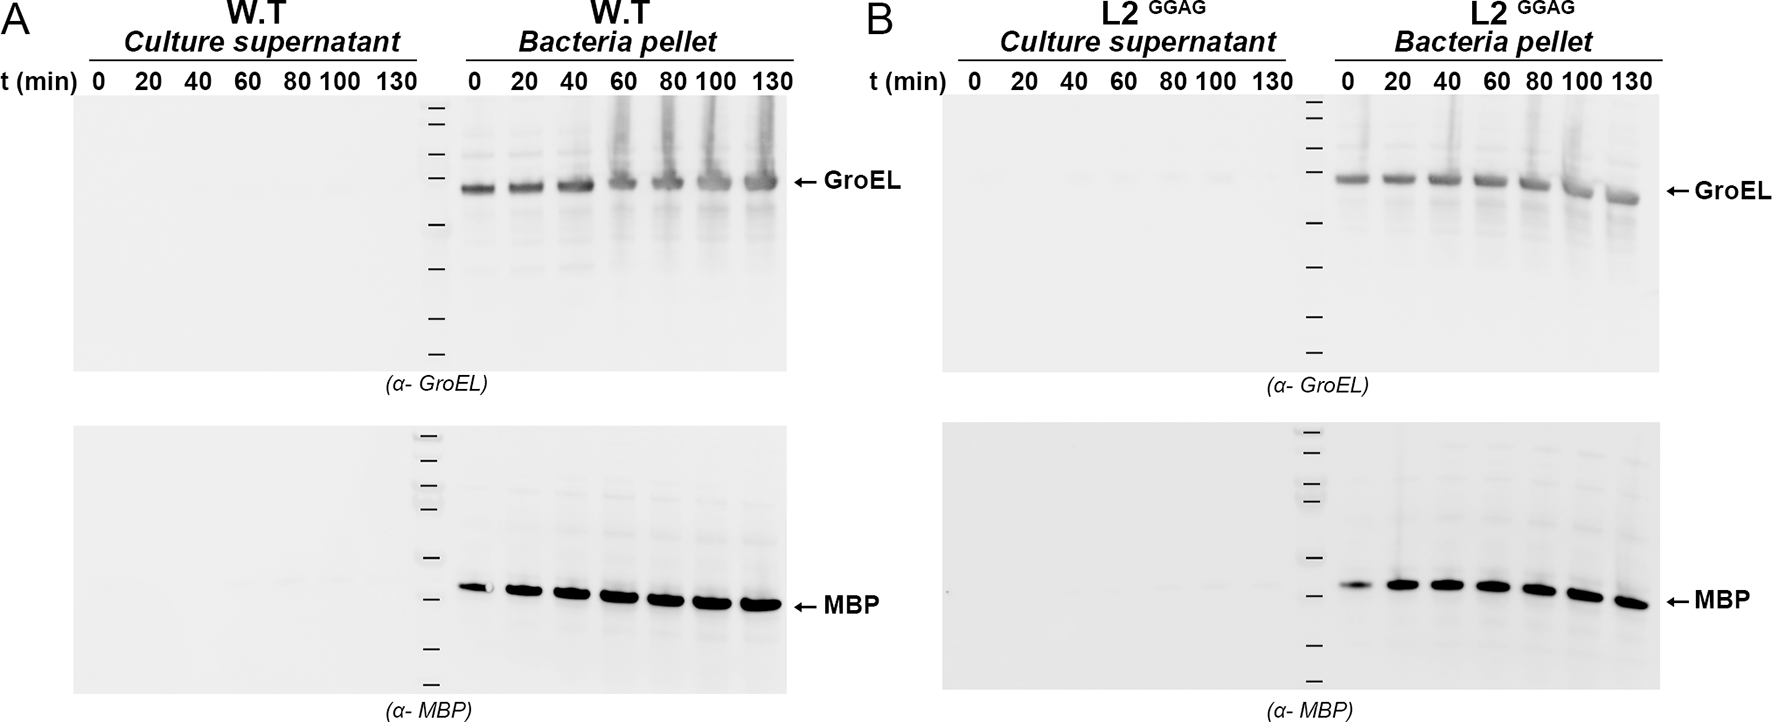

Supplement: supp [file elife-58100-supp-v1.zip › elife_poa_e58100_Figure_6_figure_supplement_1.tif]

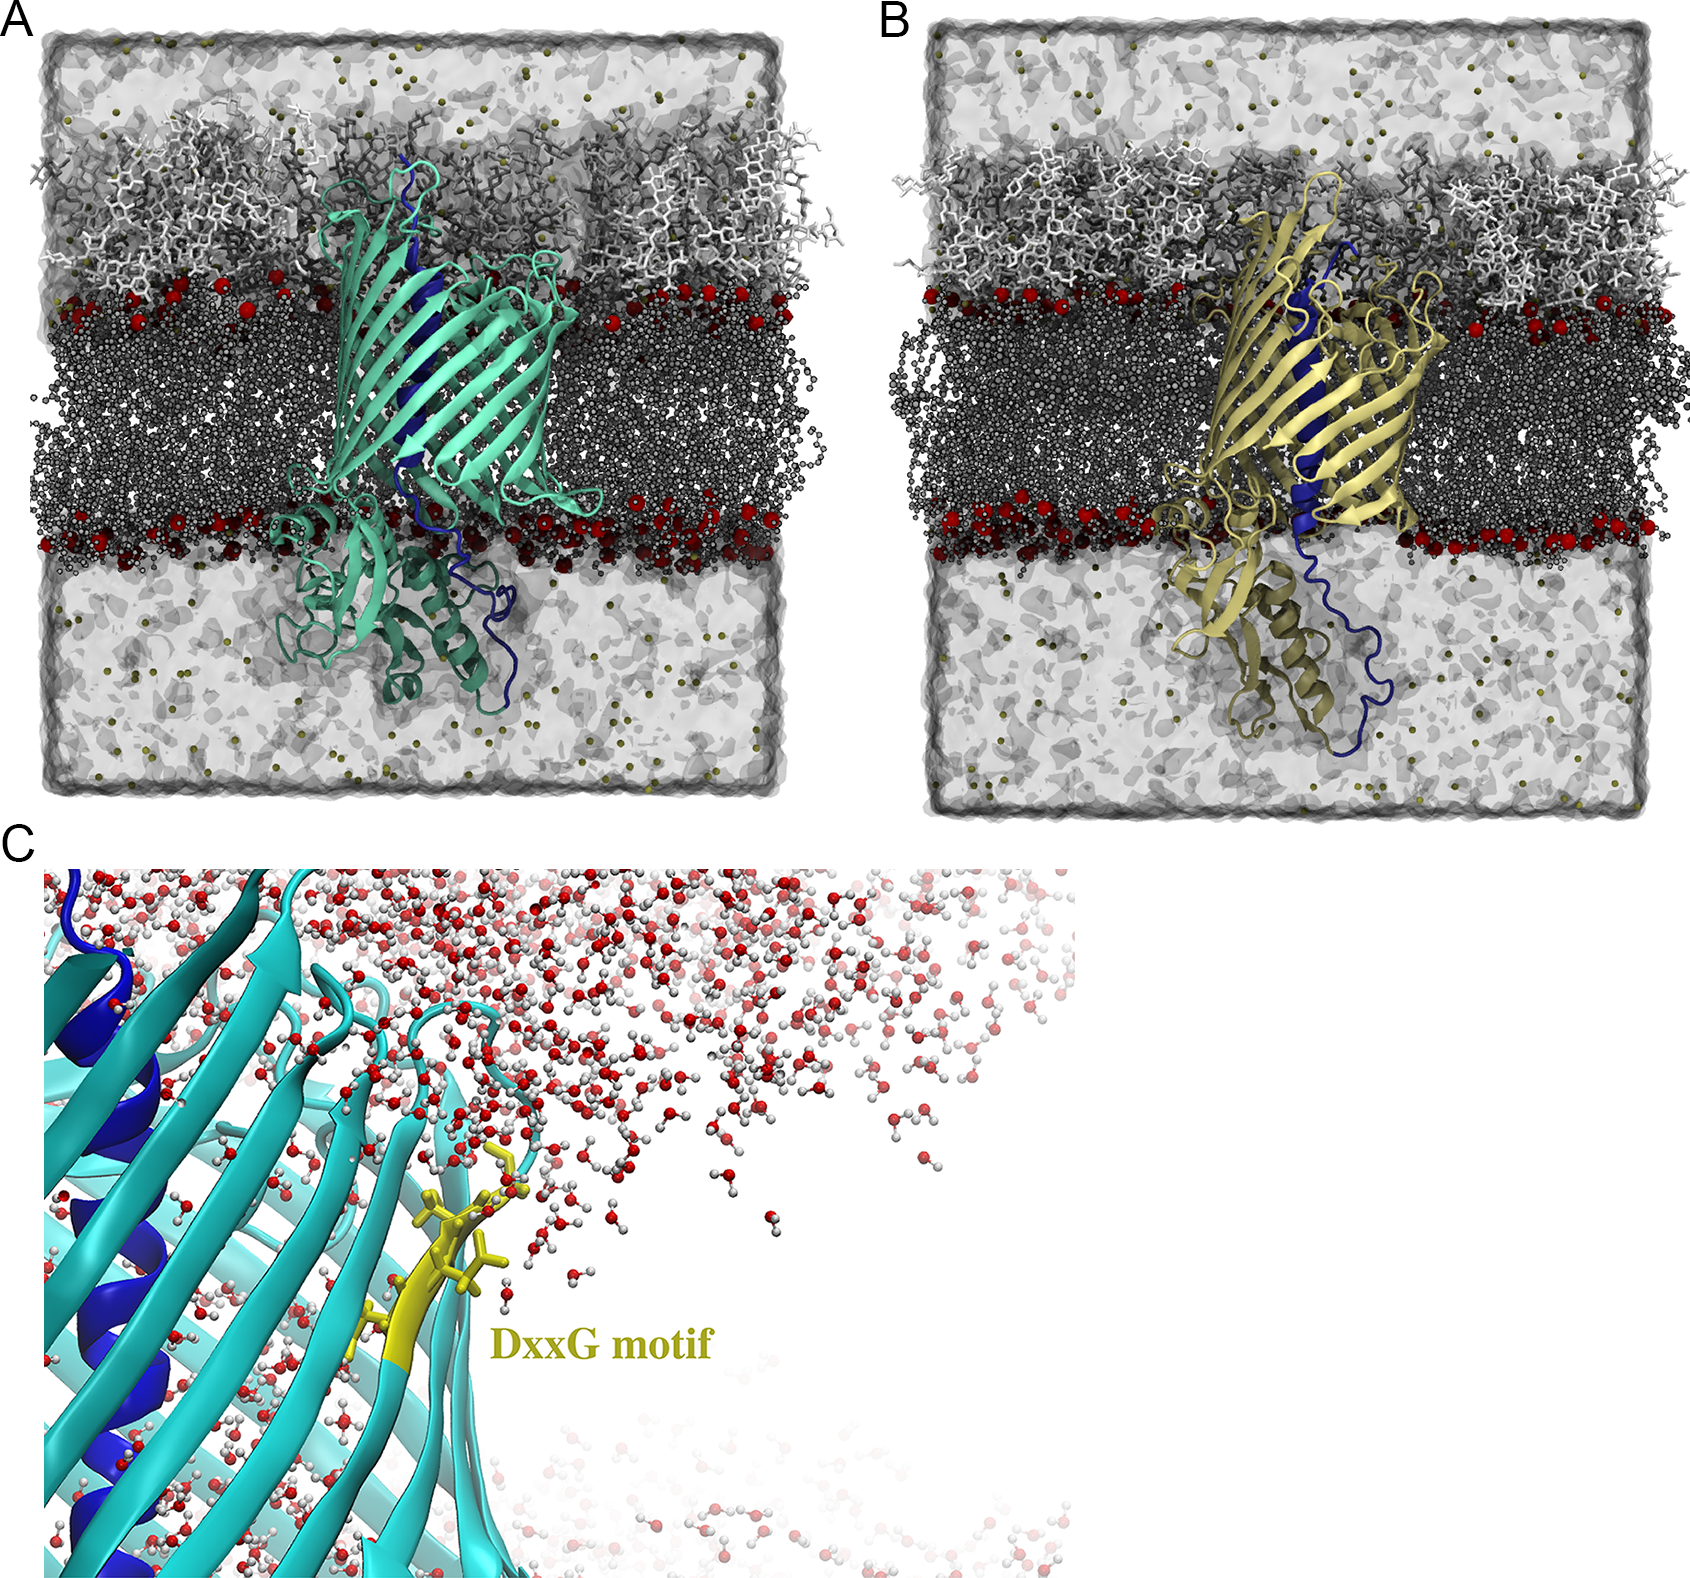

Supplement: supp [file elife-58100-supp-v1.zip › elife_poa_e58100_Figure_7_figure_supplement_1.tif]

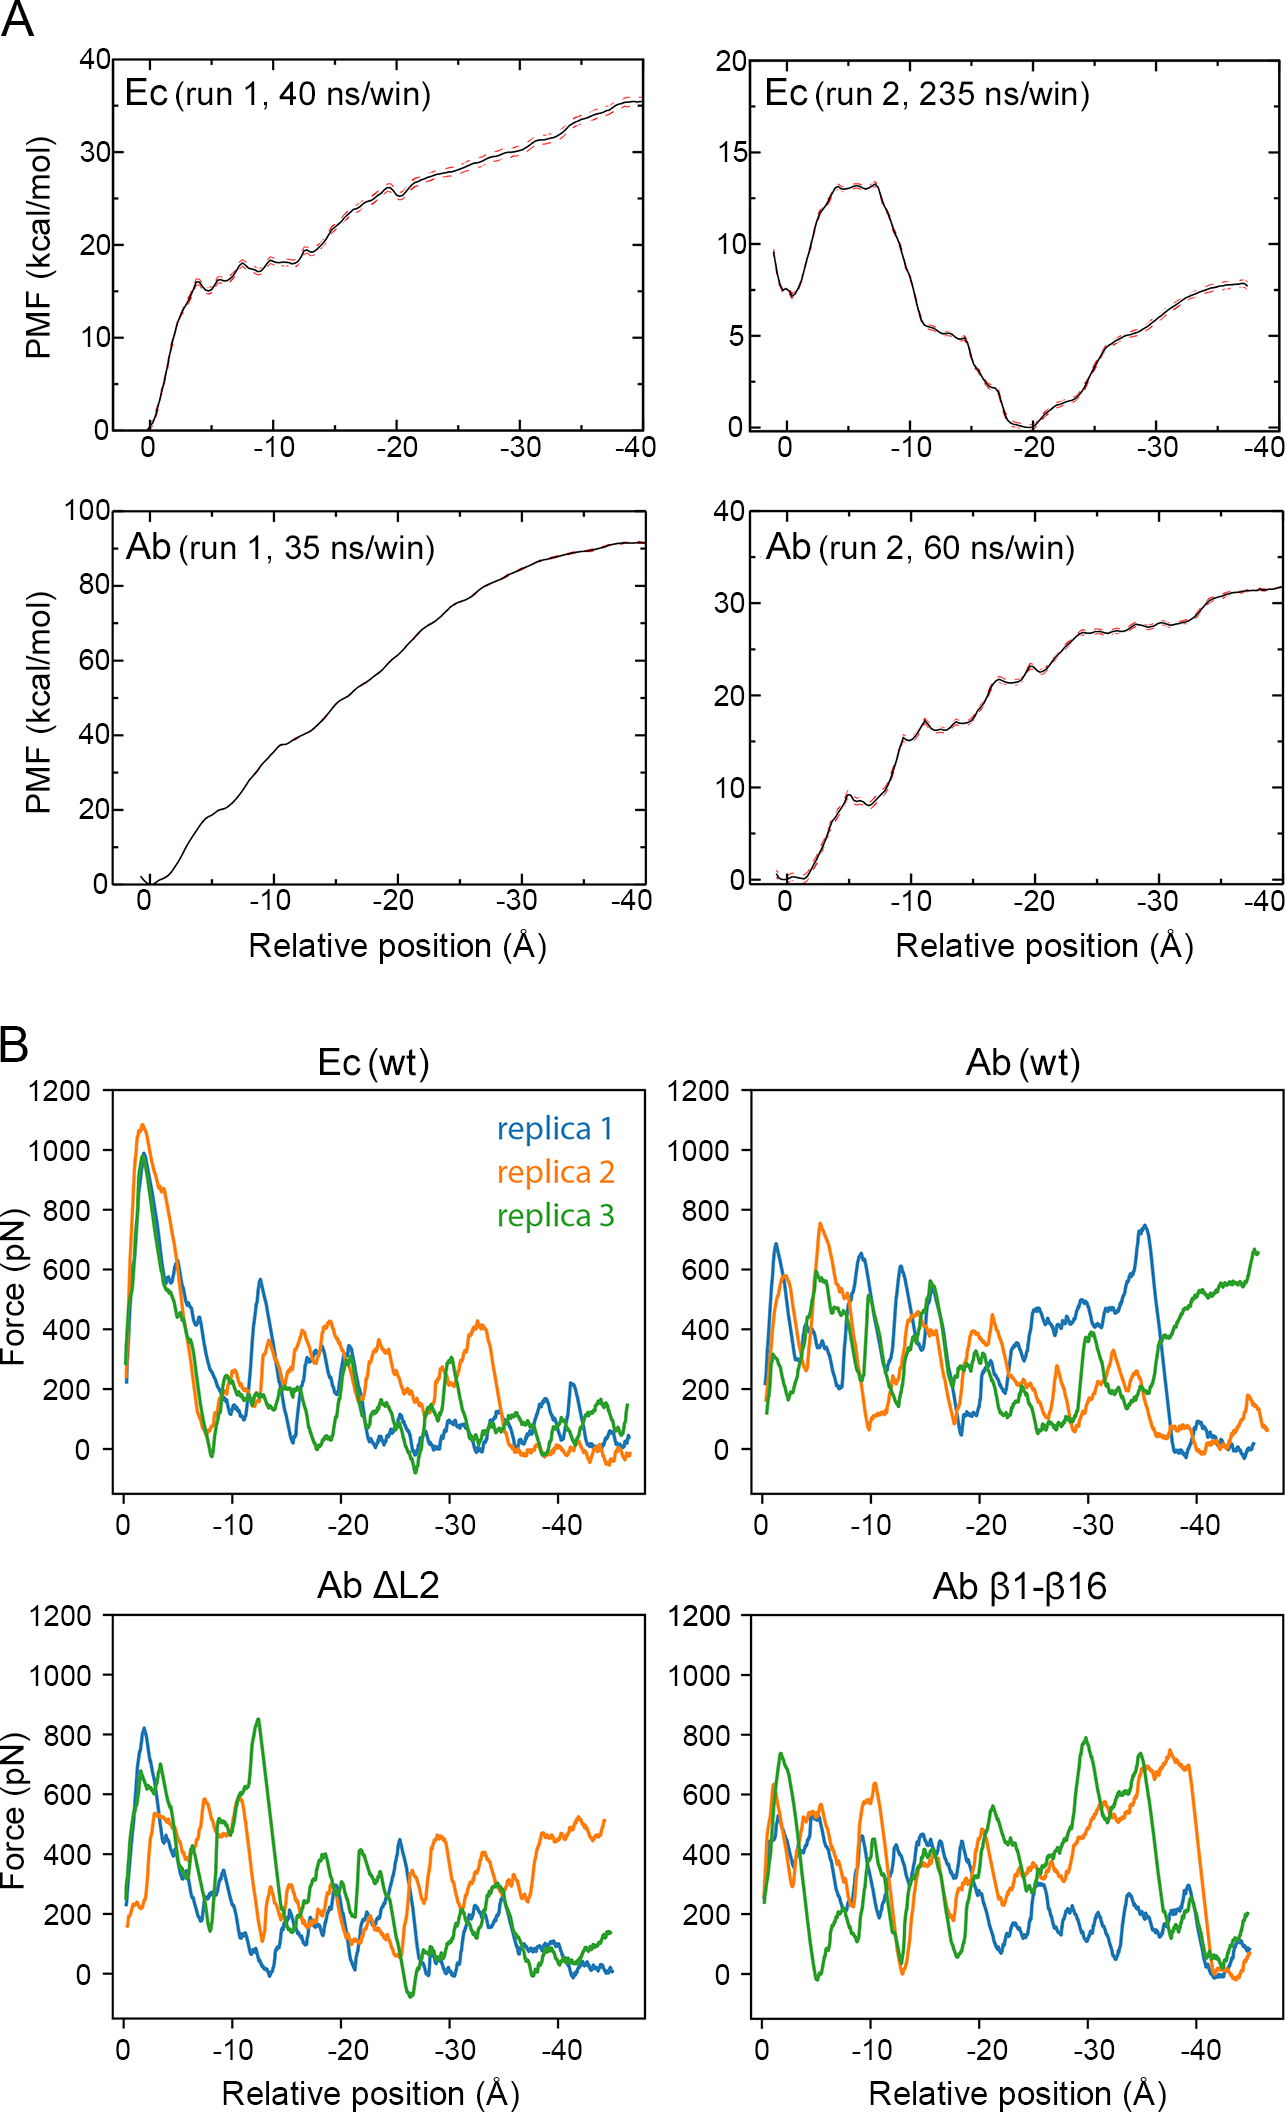

Supplement: supp [file elife-58100-supp-v1.zip › elife_poa_e58100_Figure_7_figure_supplement_2.tif]

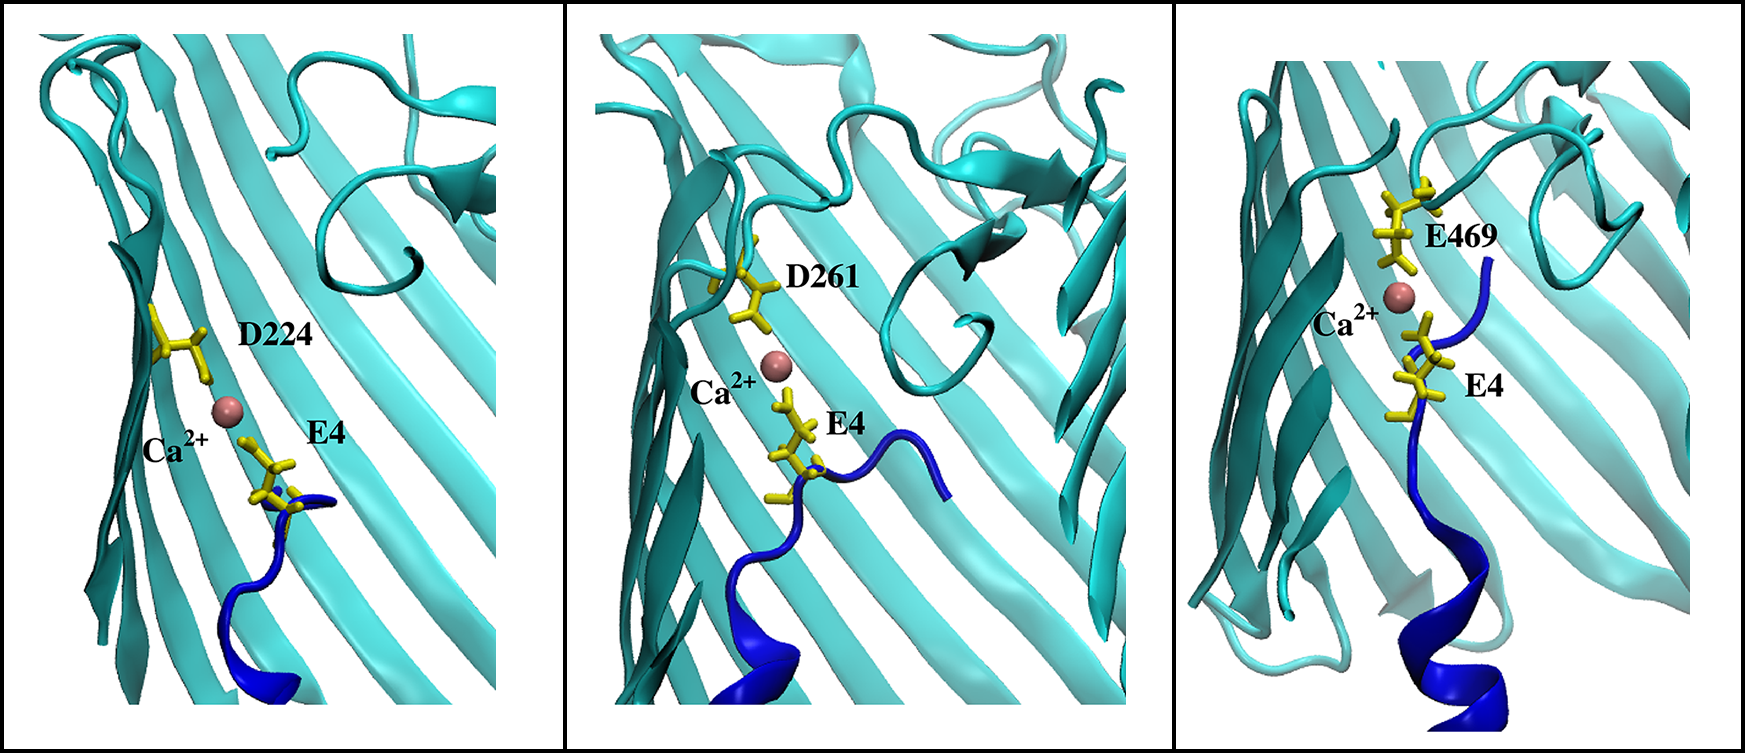

Supplement: supp [file elife-58100-supp-v1.zip › elife_poa_e58100_Figure_7_figure_supplement_3.tif]

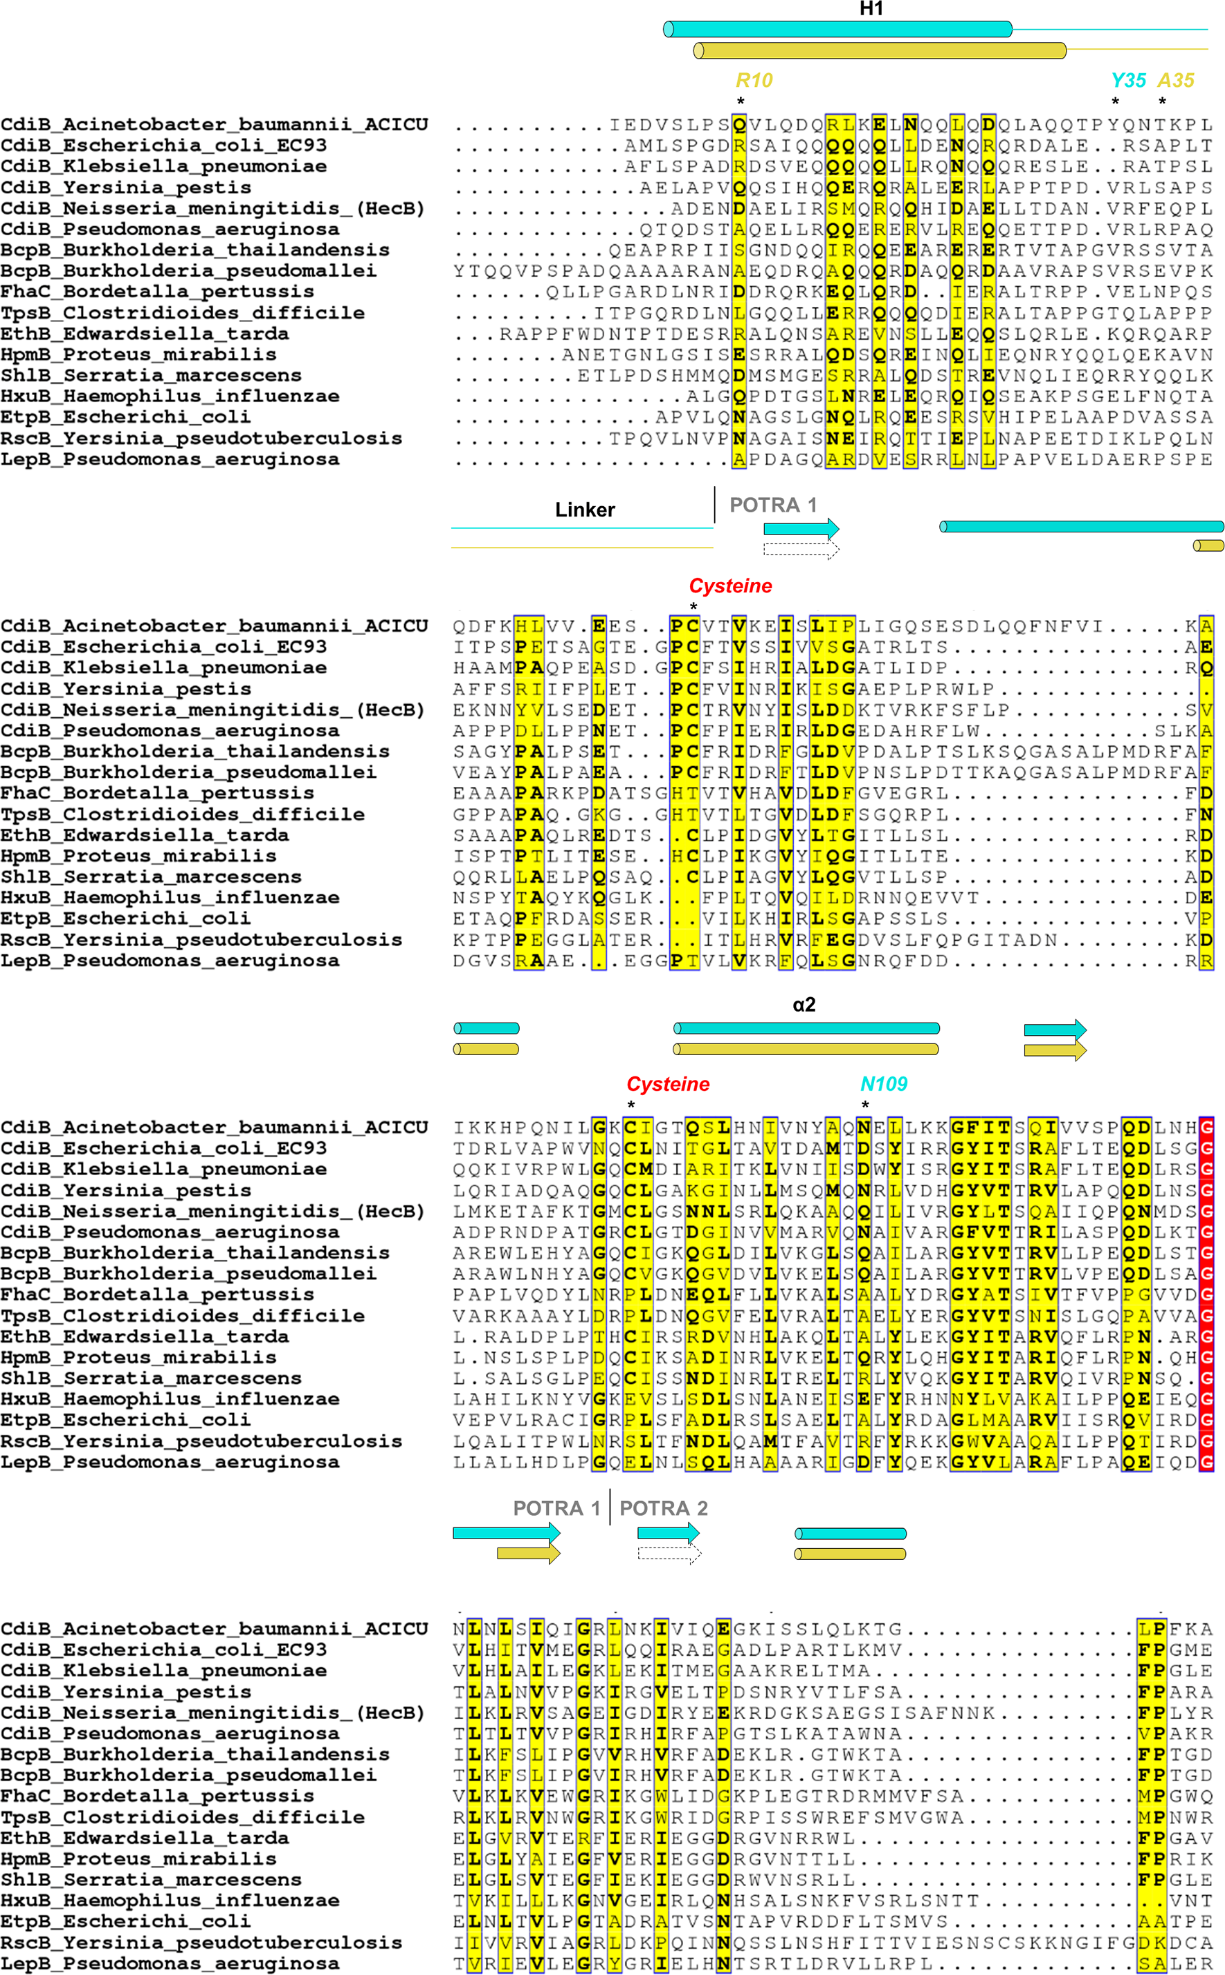


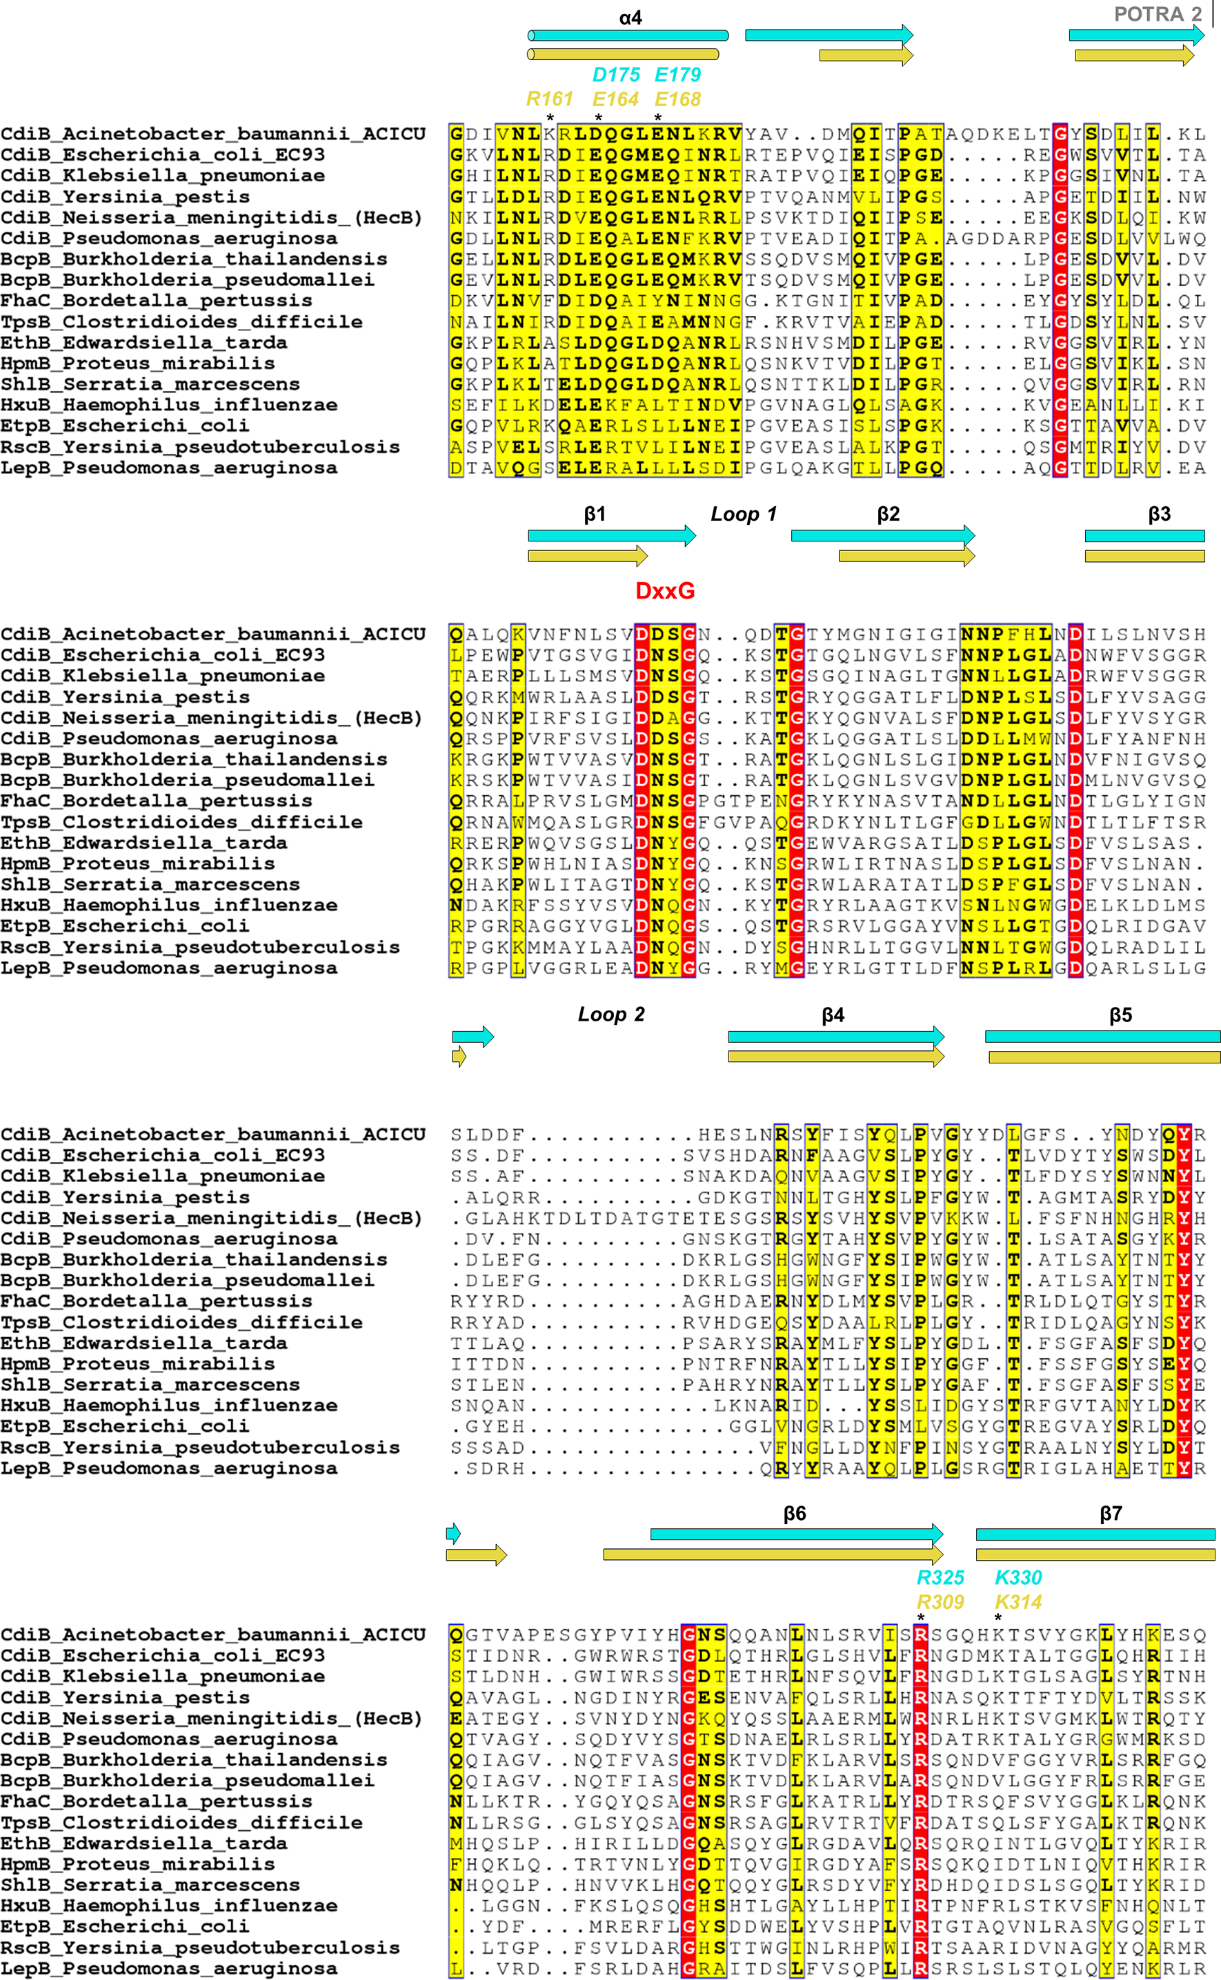


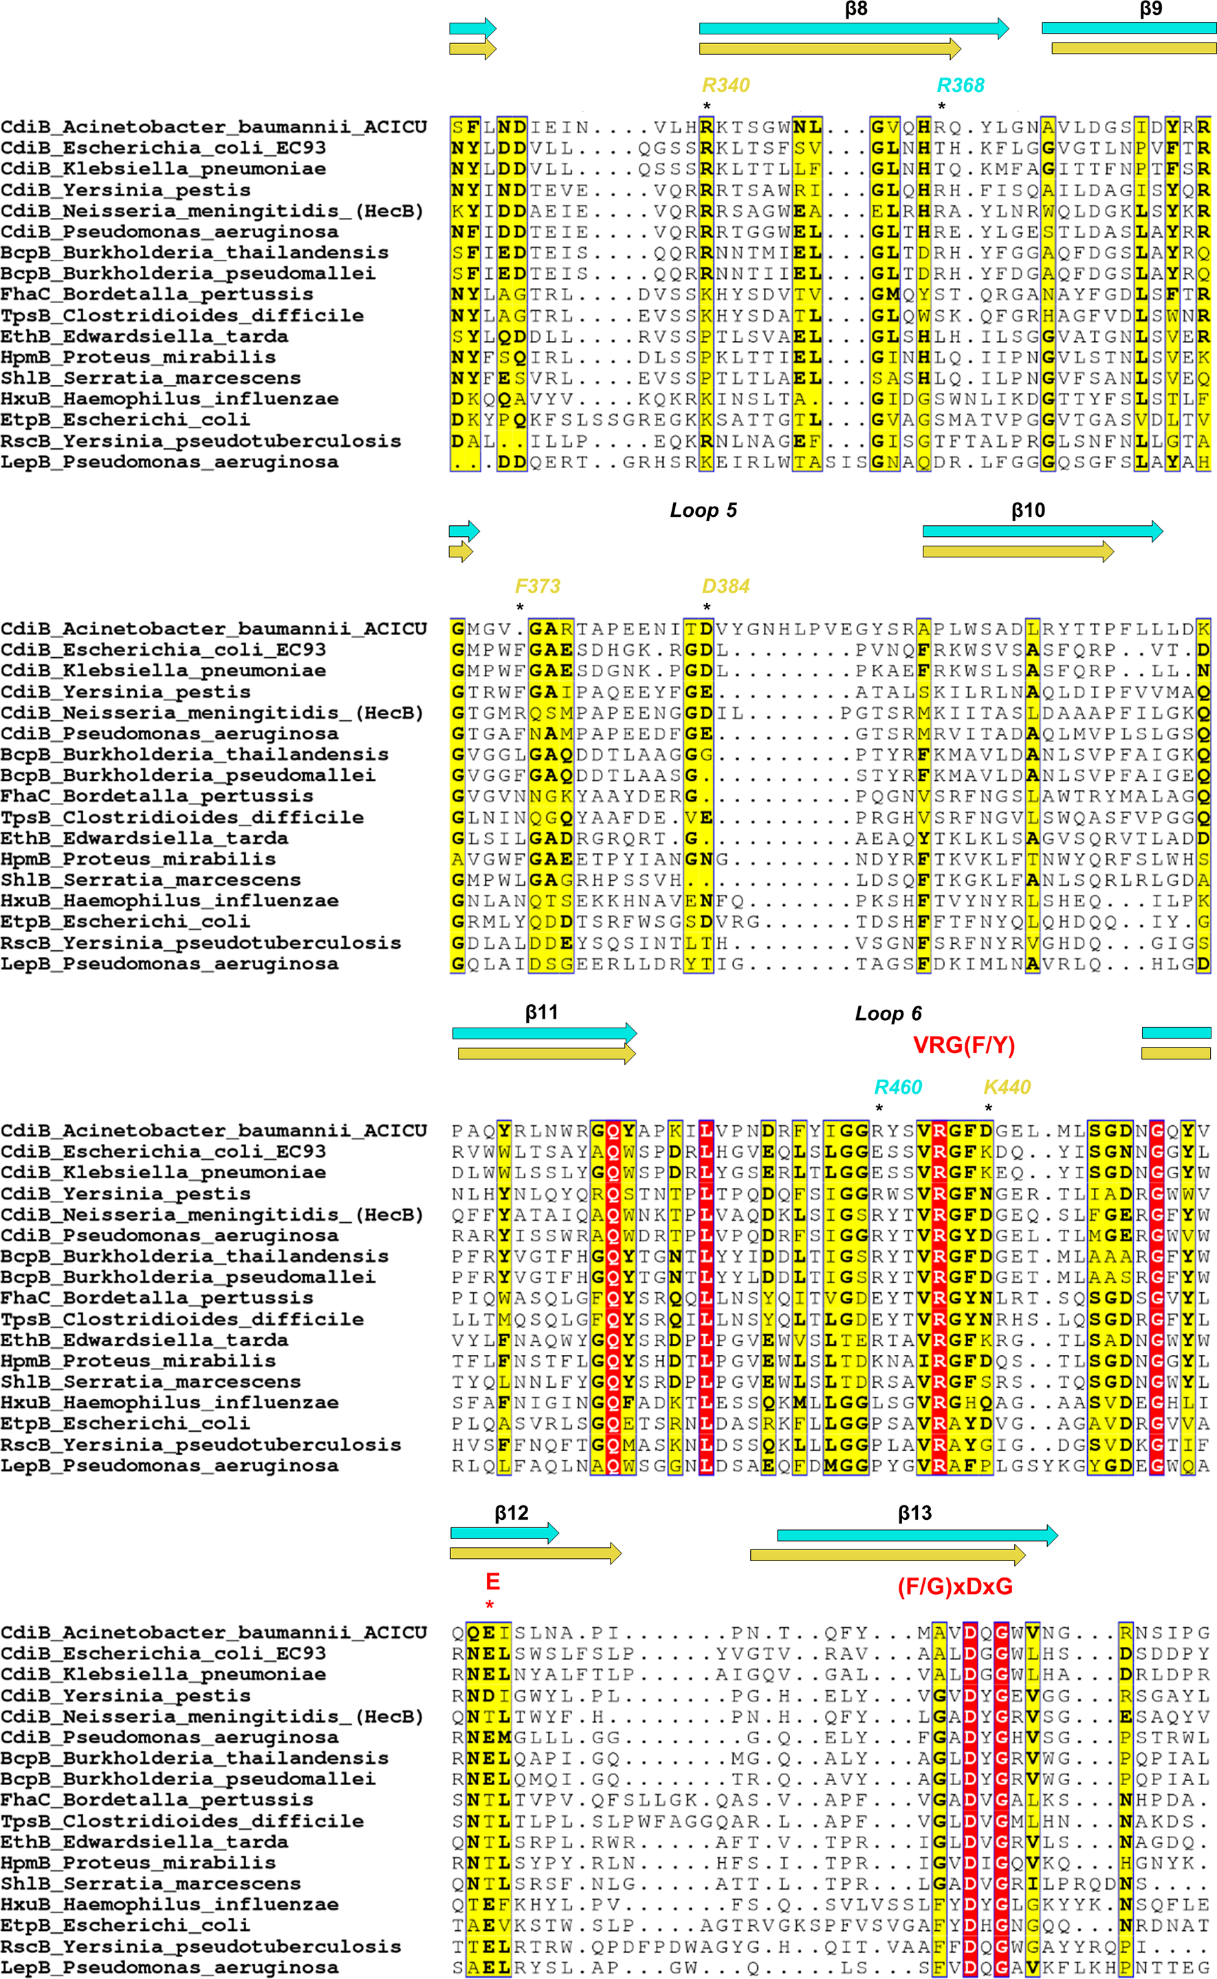


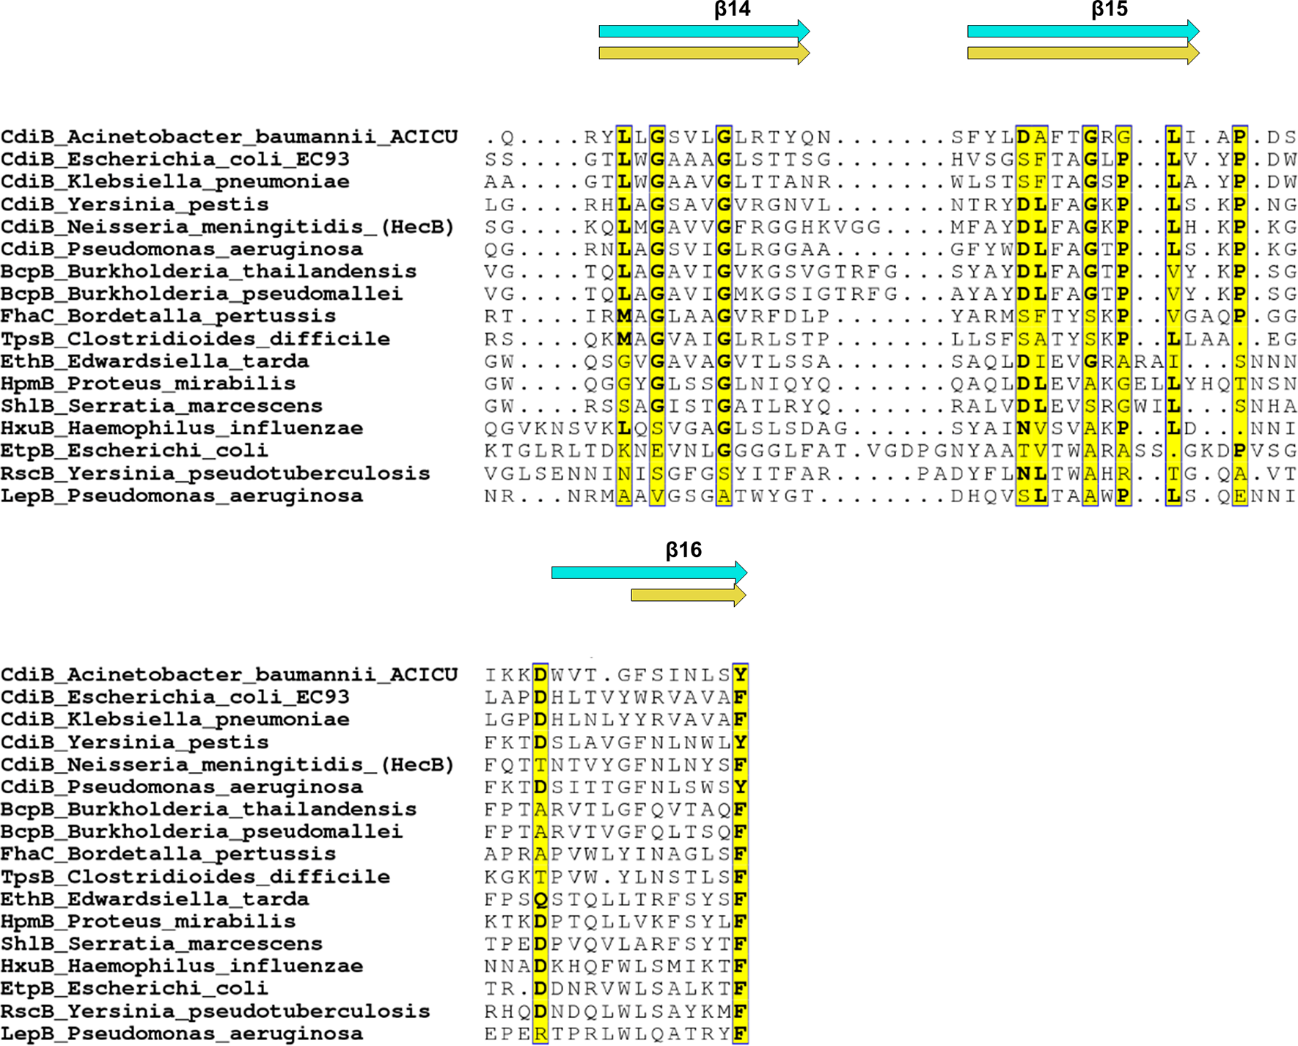

Supplement: supp [file elife-58100-supp-v1.zip › elife_poa_e58100_Supplementary_file_1.docx]
